# Supplementary material for: Associations between High Serum Adipocyte Fatty Acid Binding Protein and First Hospitalization in Kidney Transplantation Patients: A 5-Year Follow-up Study
Source: MDPI journal article supplement (doi:10.3390/ijerph17207567), 2020-10-18
Supplement: s1 [file s1]

**Table S1.** Clinical variables of the kidney transplantation with or without acute kidney injury or infection related first hospitalization events.

| Variables                            | Participants without                       | Participants with AKI                              | <i>p</i> Value | Participants with Infection                        | <i>p</i> Value |
|--------------------------------------|--------------------------------------------|----------------------------------------------------|----------------|----------------------------------------------------|----------------|
|                                      | Hospitalization Events<br>( <i>n</i> = 23) | Related Hospitalization<br>events ( <i>n</i> = 22) |                | Related Hospitalization<br>Events ( <i>n</i> = 22) |                |
| Age (years)                          | 50.57 ± 8.10                               | 53.41 ± 8.73                                       | 0.263          | 52.00 ± 11.45                                      | 0.629          |
| KT duration (months)                 | 69.13 ± 40.65                              | 86.27 ± 50.58                                      | 0.216          | 60.95 ± 33.71                                      | 0.468          |
| Height (cm)                          | 162.83 ± 8.27                              | 163.00 ± 7.85                                      | 0.943          | 159.55 ± 7.93                                      | 0.182          |
| Body weight (kg)                     | 61.26 ± 11.92                              | 63.50 ± 12.92                                      | 0.549          | 63.05 ± 12.57                                      | 0.627          |
| Body mass index (kg/m <sup>2</sup> ) | 23.00 ± 3.49                               | 23.87 ± 4.44                                       | 0.464          | 24.77 ± 4.86                                       | 0.165          |
| SBP (mmHg)                           | 131.65 ± 10.03                             | 136.64 ± 7.86                                      | 0.071          | 133.68 ± 12.51                                     | 0.551          |
| DBP (mmHg)                           | 84.70 ± 10.43                              | 87.18 ± 11.61                                      | 0.451          | 87.09 ± 11.64                                      | 0.471          |
| Albumin (mg/dL)                      | 4.23 ± 0.34                                | 4.11 ± 0.43                                        | 0.294          | 4.16 ± 0.54                                        | 0.619          |
| Total cholesterol (mg/dL)            | 185.13 ± 36.20                             | 211.00 ± 55.78                                     | 0.071          | 193.18 ± 41.22                                     | 0.490          |
| Triglyceride (mg/dL)                 | 102.00 (77.00–142.00)                      | 107.50 (82.50–176.75)                              | 0.407          | 140.50 (73.50–212.50)                              | 0.156          |
| HDL-C (mg/dL)                        | 51.17 ± 12.55                              | 52.05 ± 19.40                                      | 0.858          | 50.64 ± 16.76                                      | 0.903          |
| LDL-C (mg/dL)                        | 107.00 ± 25.76                             | 99.91 ± 41.58                                      | 0.493          | 114.95 ± 25.85                                     | 0.307          |
| Fasting glucose (mg/dL)              | 93.00 (85.00–99.00)                        | 88.00 (88.00–116.50)                               | 0.419          | 93.00 (83.00–123.50)                               | 0.716          |
| Blood urea nitrogen (mg/dL)          | 18.00 (14.00–23.00)                        | 29.50 (22.75–47.50)                                | <0.001 *       | 25.00 (17.75–37.75)                                | 0.033 *        |
| Creatinine (mg/dL)                   | 1.40 (1.00–2.10)                           | 1.85 (1.56–2.73)                                   | 0.008 *        | 1.80 (1.10–2.13)                                   | 0.562          |
| eGFR (mL/min)                        | 51.04 ± 25.21                              | 32.45 ± 14.32                                      | 0.004 *        | 44.86 ± 21.71                                      | 0.384          |
| A-FABP (ng/mL)                       | 26.90 ± 22.69                              | 54.15 ± 35.51                                      | 0.004 *        | 44.70 ± 31.82                                      | 0.036 *        |
| Female, <i>n</i> (%)                 | 9 (39.1)                                   | 10 (45.5)                                          | 0.668          | 12 (54.5)                                          | 0.300          |

|                                         |           |           |         |           |         |
|-----------------------------------------|-----------|-----------|---------|-----------|---------|
| Diabetes, <i>n</i> (%)                  | 1 (4.3)   | 5 (22.7)  | 0.070   | 5 (22.7)  | 0.070   |
| Hypertension, <i>n</i> (%)              | 4 (17.4)  | 10 (45.5) | 0.042 * | 9 (40.9)  | 0.082   |
| Deceased donor KT, <i>n</i> (%)         | 19 (82.6) | 20 (90.9) | 0.413   | 19 (86.4) | 0.728   |
| Tacrolimus use, <i>n</i> (%)            | 15 (65.2) | 11 (54.0) | 0.302   | 14 (63.6) | 0.912   |
| Mycophenolate mofetil use, <i>n</i> (%) | 19 (82.6) | 15 (68.2) | 0.260   | 15 (68.2) | 0.260   |
| Steroid use, <i>n</i> (%)               | 15 (65.2) | 20 (90.9) | 0.038 * | 20 (90.9) | 0.038 * |
| Rapamycin use, <i>n</i> (%)             | 2 (8.7)   | 6 (27.3)  | 0.103   | 5 (22.7)  | 0.194   |
| Cyclosporine use, <i>n</i> (%)          | 6 (26.1)  | 6 (27.3)  | 0.928   | 4 (18.2)  | 0.524   |

Values for continuous variables given as means  $\pm$  standard deviation and compared by Student's *t*-test; variables not normally distributed given as medians and interquartile range and compared by Mann-Whitney U test; values are presented as number (%), and analysis was performed using the chi-square test. AKI, acute kidney injury; A-FABP, adipocyte fatty acid binding protein; DBP, diastolic blood pressure; eGFR, estimated glomerular filtration rate; HDL-C, high-density lipoprotein cholesterol; KT, kidney transplantation; LDL-C, low-density lipoprotein cholesterol; SBP, systolic blood pressure. \*  $p < 0.05$  was considered statistically significant.

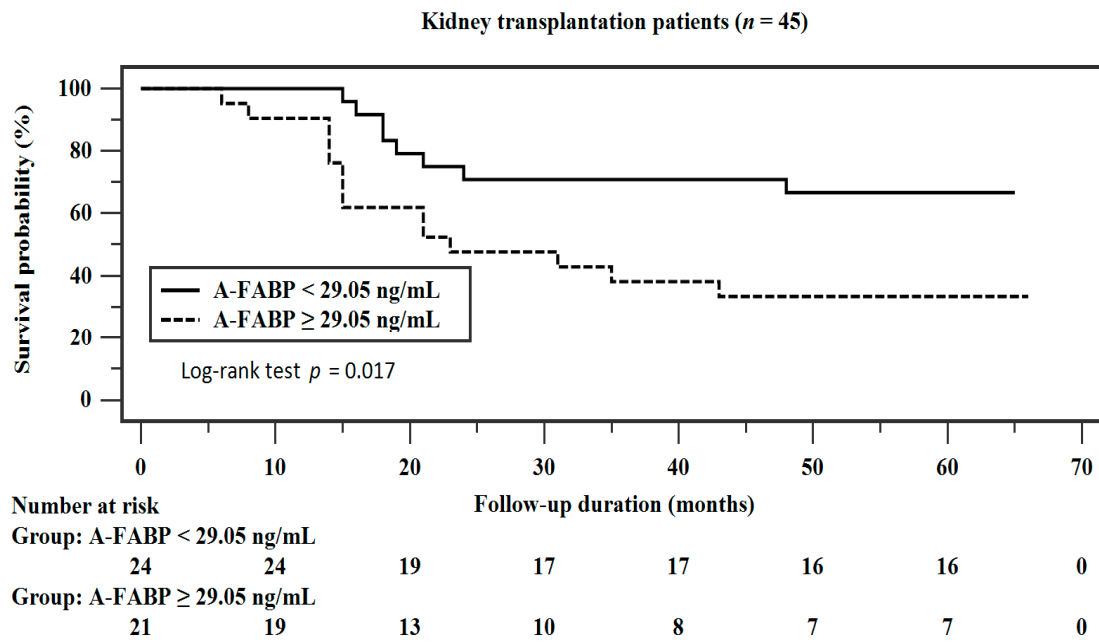

**Figure S1.** Kaplan–Meier analysis of A-FABP serums levels and acute kidney injury related first hospitalization events in KT patients.

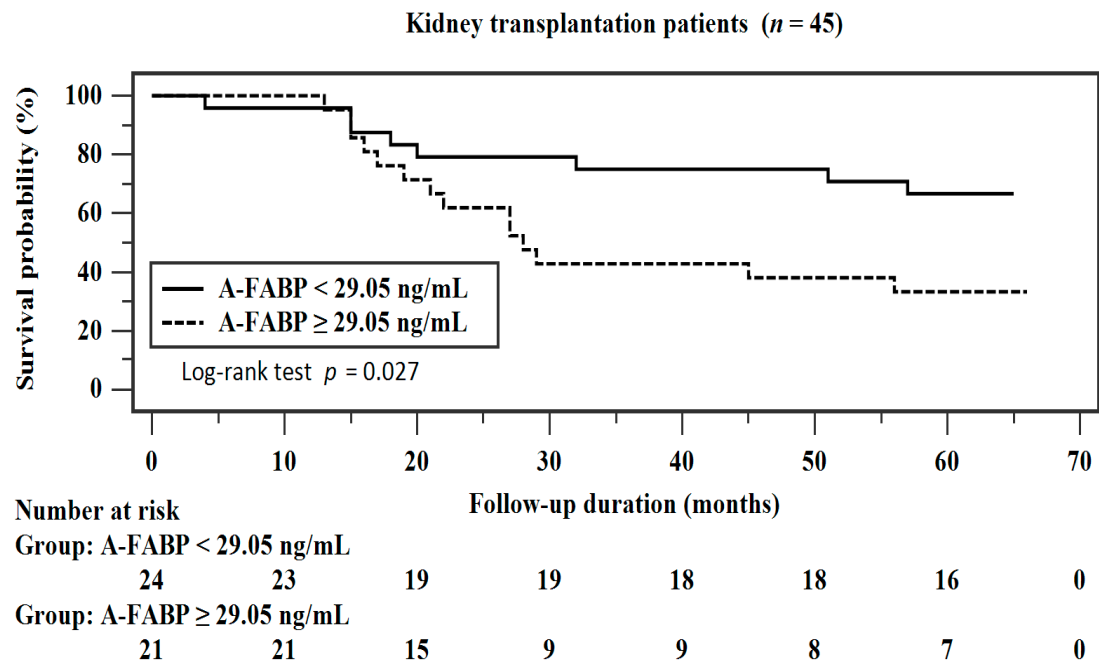

**Figure S2.** Kaplan–Meier analysis of A-FABP serums levels and infection related first hospitalization events in KT patients.

**Table S2.** Cox regression for acute kidney injury related first hospitalization events of adipocyte fatty acid binding protein levels among the 45 kidney transplantation patients.

|                    | Unadjusted             |                | Model 1                |                | Model 2                |                | Model 3                |                |
|--------------------|------------------------|----------------|------------------------|----------------|------------------------|----------------|------------------------|----------------|
|                    | HR (95% CI)            | <i>p</i> Value | HR (95% CI)            | <i>p</i> Value | HR (95% CI)            | <i>p</i> Value | HR (95% CI)            | <i>p</i> Value |
| A-FABP,<br>1 ng/mL | 1.027<br>(1.013–1.041) | <0.001 *       | 1.032<br>(1.015–1.049) | <0.001 *       | 1.027<br>(1.009–1.046) | 0.003 *        | 1.023<br>(1.004–1.043) | 0.020 *        |

Model 1 is adjusted for age, gender and body mass index. Model 2 is adjusted for the Model 1 variables and for diabetes mellitus and hypertension. Model 3 is adjusted for the Model 2 variables and for glomerular filtration rate, triglyceride and steroid used. \*  $p < 0.05$  was considered statistically significant.

**Table S3.** Cox regression for infection related first hospitalization events of adipocyte fatty acid binding protein levels among the 45 kidney transplantation patients.

|                    | Unadjusted             |                | Model 1                |                | Model 2                |                | Model 3                |                |
|--------------------|------------------------|----------------|------------------------|----------------|------------------------|----------------|------------------------|----------------|
|                    | HR (95% CI)            | <i>p</i> Value | HR (95% CI)            | <i>p</i> Value | HR (95% CI)            | <i>p</i> Value | HR (95% CI)            | <i>p</i> Value |
| A-FABP,<br>1 ng/mL | 1.017<br>(1.004–1.030) | 0.013 *        | 1.014<br>(0.999–1.030) | 0.075          | 1.010<br>(0.992–1.028) | 0.281          | 1.007<br>(0.988–1.027) | 0.454          |

Model 1 is adjusted for age, gender and body mass index. Model 2 is adjusted for the Model 1 variables and for diabetes mellitus and hypertension. Model 3 is adjusted for the Model 2 variables and for glomerular filtration rate, triglyceride and steroid used. \*  $p < 0.05$  was considered statistically significant.
